# Supplementary material for: A Thermo-Responsive Polymer Micelle with a Liquid Crystalline Core
Source: MDPI journal article supplement (doi:10.3390/polym15030770), 2023-02-02
Supplement: s1 [file s1]

## Supporting Information

### Thermo-responsive Polymer Micelle with Liquid Crystalline Core

Yoko Mizoue<sup>1</sup>, Rintaro Takahashi<sup>2</sup>, Kazuo Sakurai<sup>3</sup> and Shin-ichi Yusa<sup>1</sup>

<sup>1</sup> Department of Applied Chemistry, Graduate School of Engineering, University of Hyogo, 2167 Shosha, Himeji, Hyogo 671-2280, Japan; ym85725@gmail.com (Y.M.)

<sup>2</sup> Department of Energy Engineering, Graduate School of Engineering, Nagoya University, Furo-cho, Chikusa-ku, Nagoya 464-8603, Aichi, Japan; r-takahashi@energy.nagoya-u.ac.jp (R.T.)

<sup>3</sup> Department of Chemistry and Biochemistry, University of Kitakyushu, 1-1 Hibikino, Kitakyushu, Fukuoka 808-0135, Japan; sakurai@kitakyu-u.ac.jp (K.S.)

\* Correspondence: yusa@eng.u-hyogo.ac.jp (S.Y.)

**Table S1.** Glass transition ( $T_g$ ) and melting temperatures ( $T_m$ ) of PChM and PChM-PNIPAM.

| Sample      | $T_{g1}^a$ (°C) | $T_{g2}^b$ (°C) | $T_m$ (°C) |
|-------------|-----------------|-----------------|------------|
| PChM        | 51              | —               | 169        |
| PChM-PNIPAM | 50              | 140             | 171        |

<sup>a</sup> Glass transition temperature of PChM. <sup>b</sup> Glass transition temperate of PNIPAM.

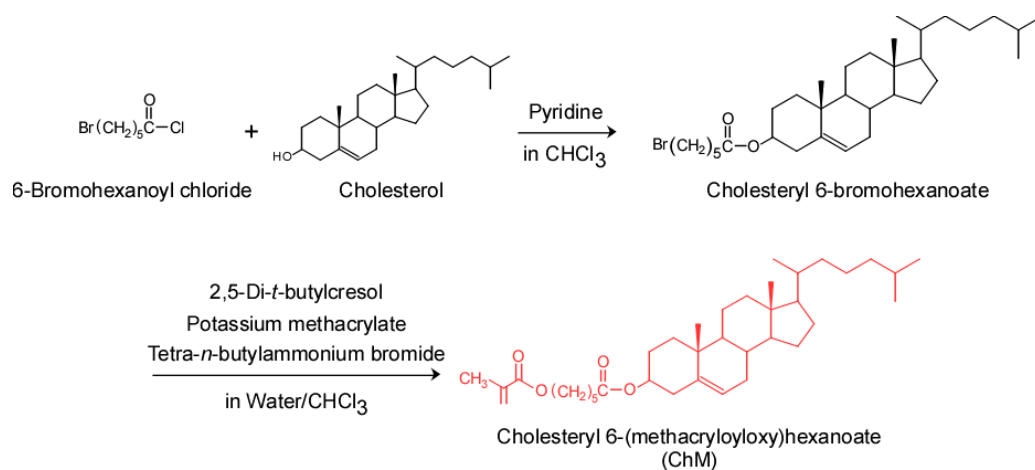

**Scheme S1.** Synthesis of ChM.

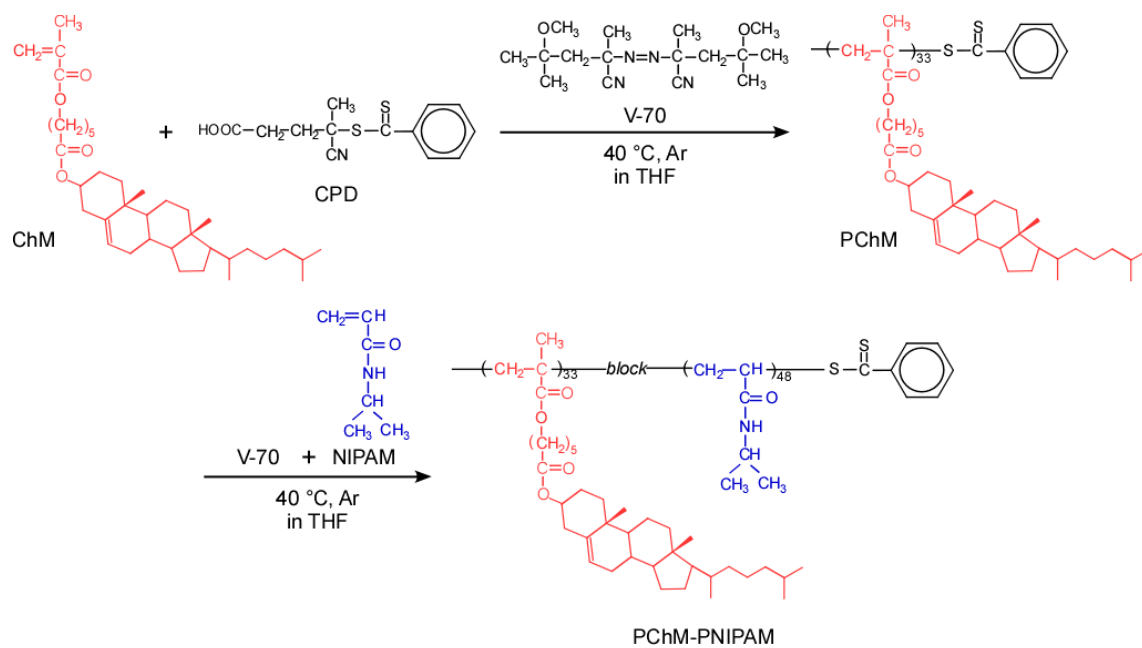

**Scheme S2.** Synthesis of (a) PChM and (b) PChM-PNIPAM.

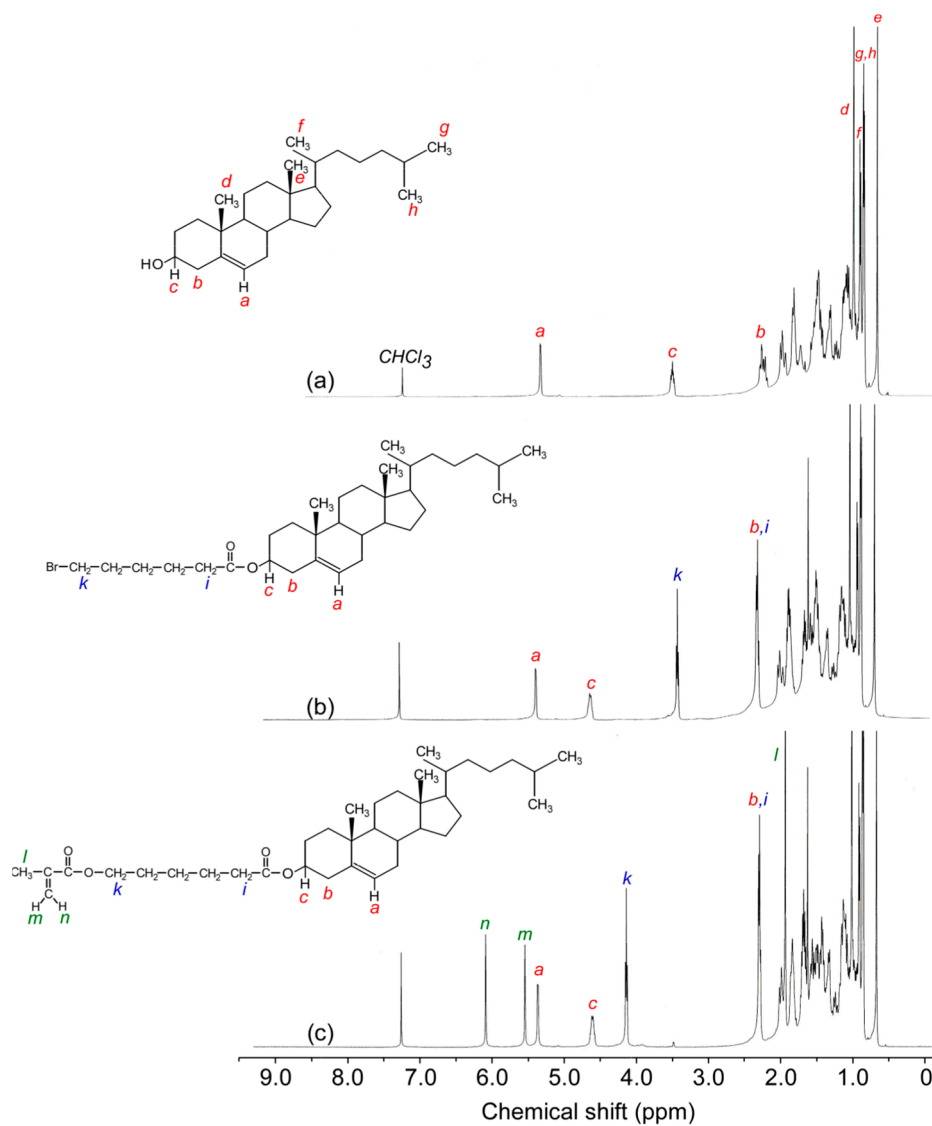

**Figure S1.**  $^1\text{H}$  NMR spectra of (a) cholesterol, (b) cholesteryl 6-bromohexanoate, and (c) ChM in  $\text{CDCl}_3$ .

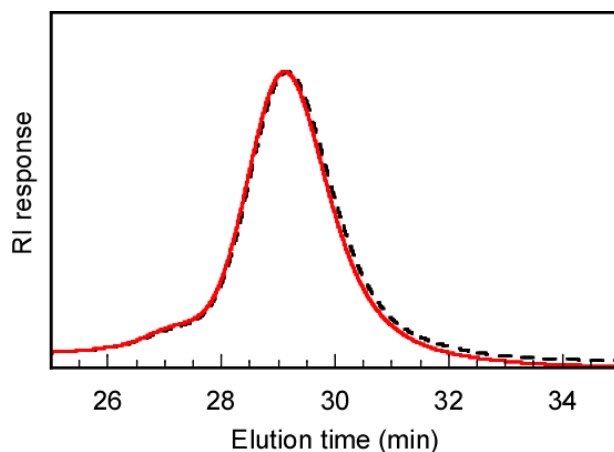

**Figure S2.** Gel-permeation chromatography (GPC) elution curve for PChM (---) and PChM-PNIPAM (—) using THF as the eluent with a flow rate of 1.0 mL/min at 40 °C.

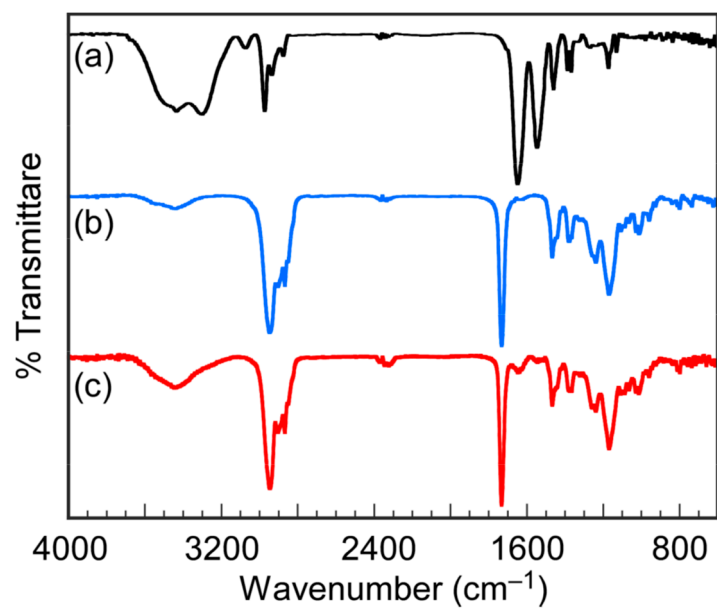

**Figure S3.** Fourier-transform infrared (FTIR) spectra using KBr pellets for (a) PNIPAM, (b) PChM, and (c) PChM-PNIPAM.

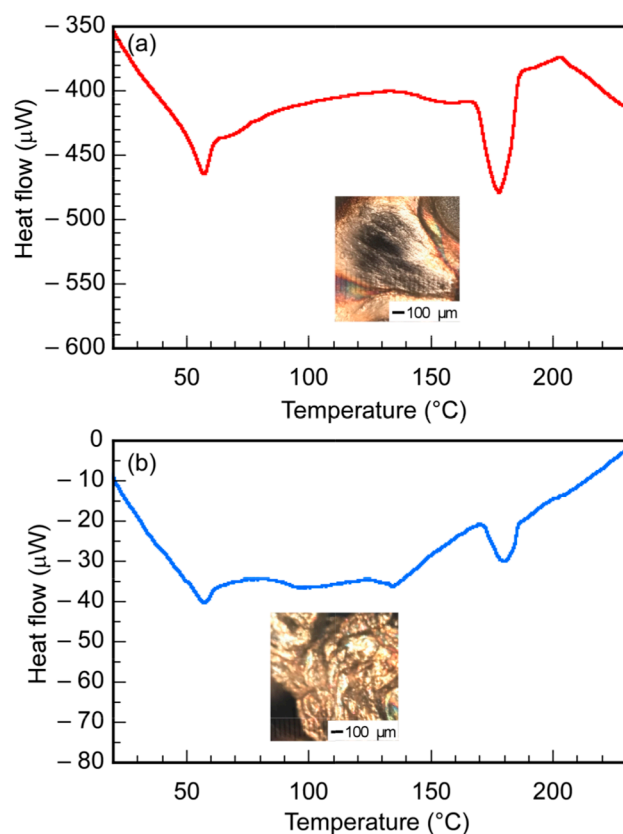

**Figure S4.** Differential scanning calorimetry (DSC) curves of (a) PChM and (b) PChM-PNIPAM with the second heating processes. The inserts are typical polarizing optical micrographs for (a) PChM at 140 °C and PChM-PNIPAM at 110 °C.

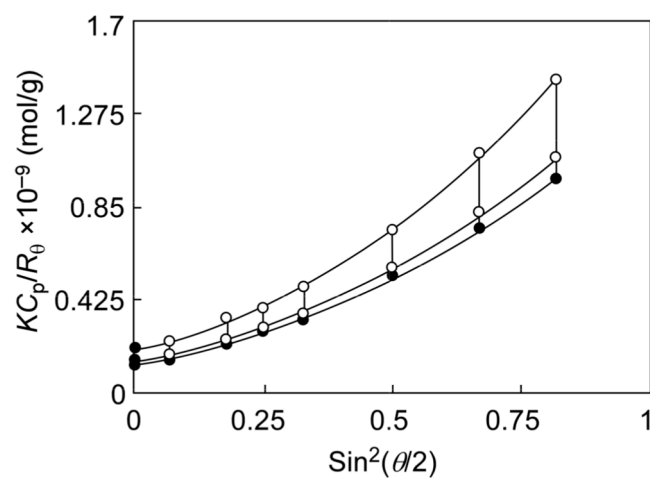

**Figure S5.** Zimm plot for PChM-PNIPAM in water at 25 °C.

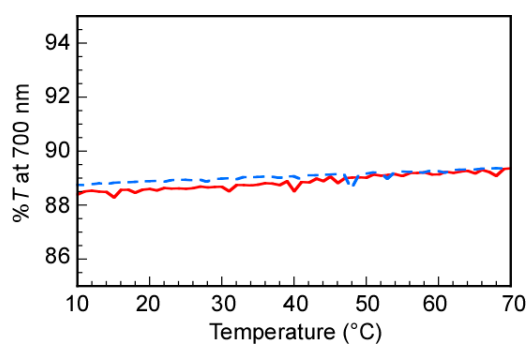

**Figure S6.** Percentage transmittance (% $T$ ) for the PChM-PNIPAM aqueous solution with a polymer concentration ( $C_p$ ) = 0.04 g/L as a function of temperature: heating (—) and cooling processes (---).

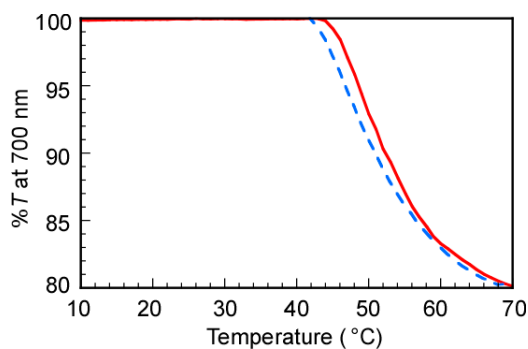

**Figure S7.** Percentage transmittance (% $T$ ) of the PNIPAM<sub>53</sub> with degree of polymerization (DP) = 53 aqueous solution with polymer concentration ( $C_p$ ) = 0.05 g/L as a function of temperature: heating (—) and cooling processes (---).

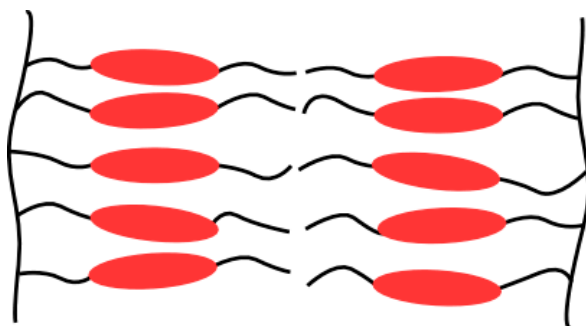

**Figure S8.** Conceptual illustration of the packing structures of the pendant cholesteryl groups of PChM-PNIPAM in an aqueous solution.
